# Supplementary material for: Fighting the storm: could novel anti-TNFα and anti-IL-6 C. sativa cultivars tame cytokine storm in COVID-19?
Source: Aging (Albany NY). 2021 Jan 19;13(2):1571–90. doi: 10.18632/aging.202500 (PMC7880317; doi:10.18632/aging.202500)
Supplement: Supplementary Figure 1 [file aging-13-202500-s001.pdf]

## SUPPLEMENTARY FIGURE

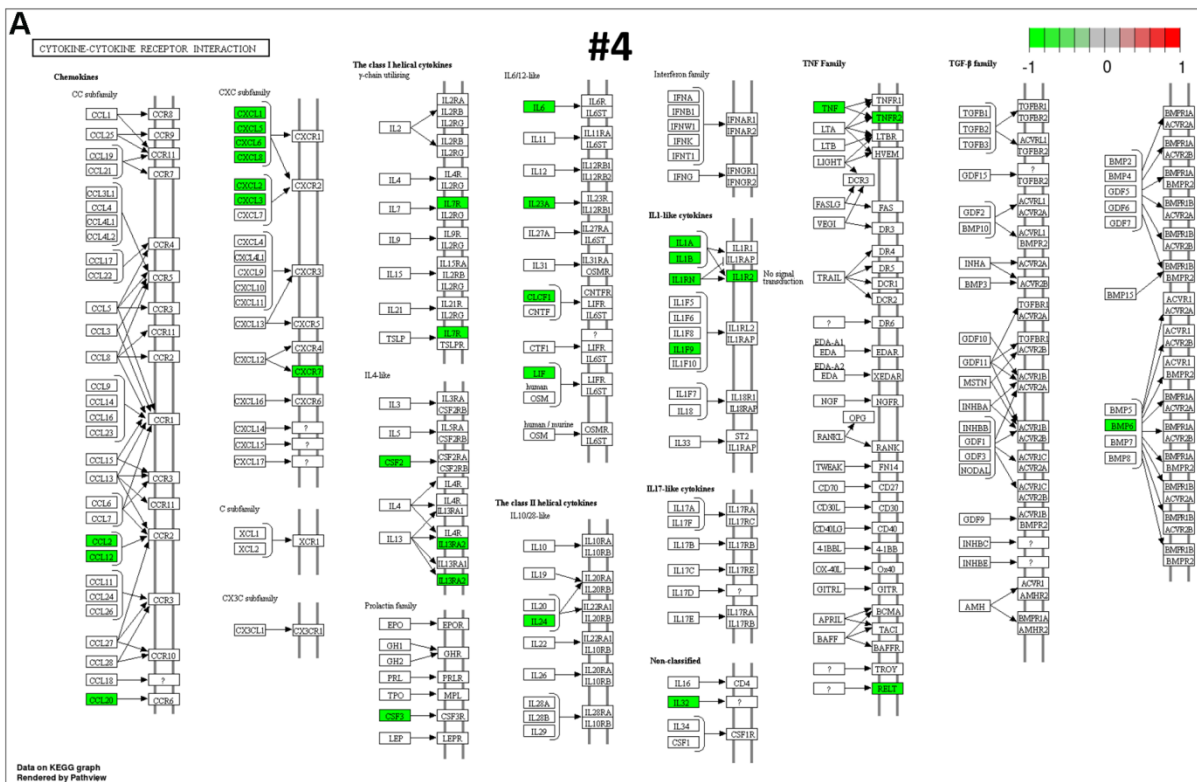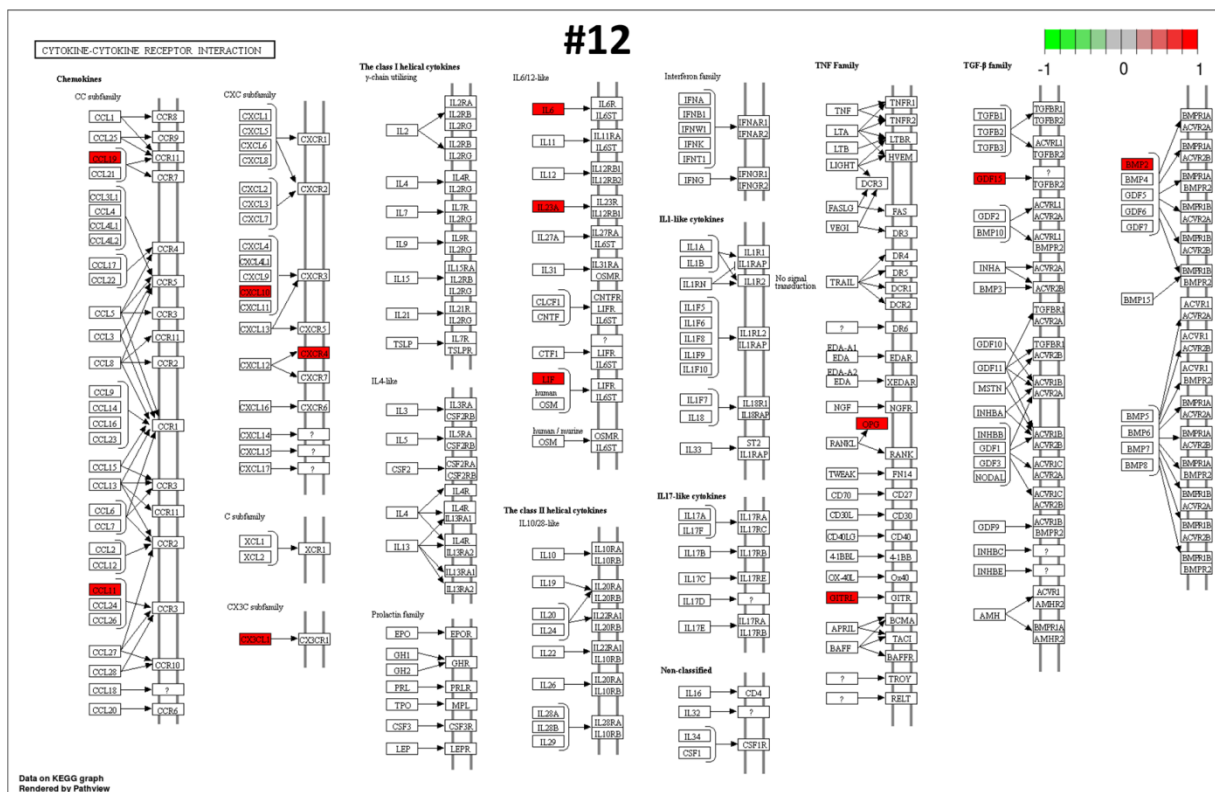



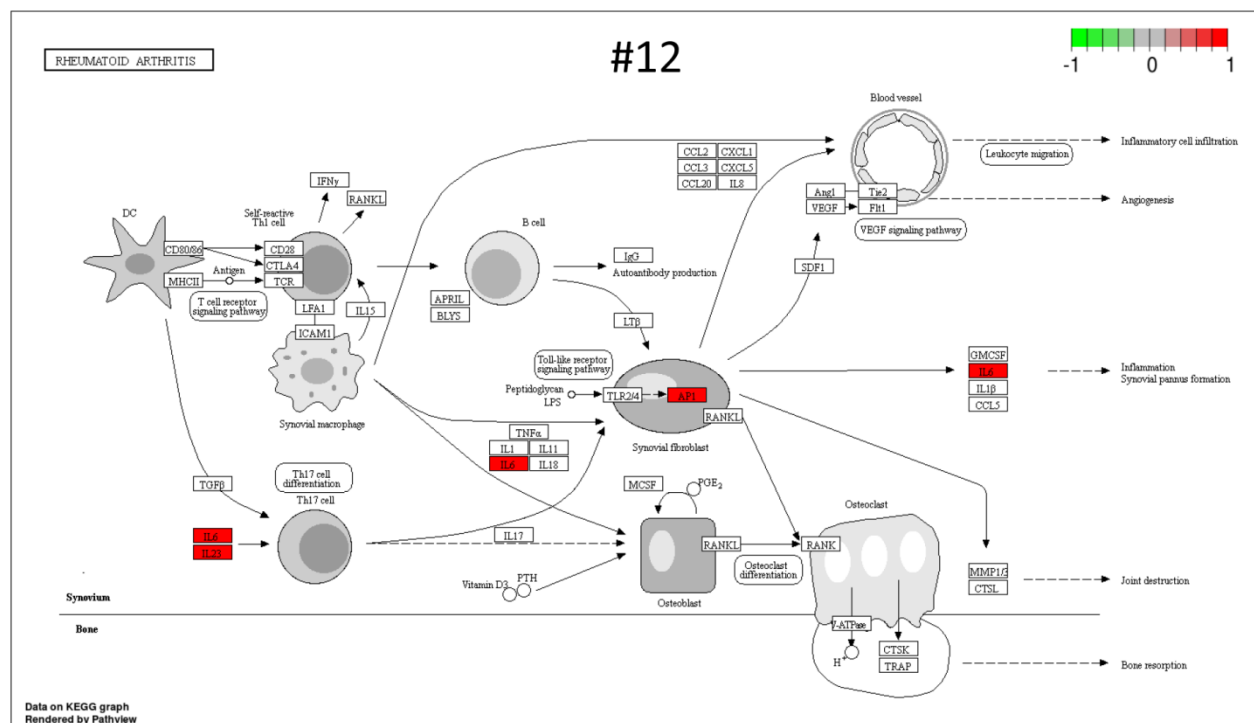

**Supplementary Figure 1. Effects of selected extracts on 3D tissues on cytokine-cytokine receptor interactions and rheumatoid arthritis pathways.** Generally applicable gene set enrichment (GAGE) for pathway analysis method was used in unidirectional mode to detect experimentally perturbed KEGG pathways [62]. **(A)** Changes in the cytokine-cytokine receptor interactions pathway caused by extracts #4 and #12. **(B)** Changes in the rheumatoid arthritis pathway caused by extracts #4, #14 and #12. Red - upregulation; green – down-regulation.
